# Supplementary material for: Machine learning suggests polygenic risk for cognitive dysfunction in amyotrophic lateral sclerosis
Source: PubMed Central journal article supplement (PMC7799365; doi:10.15252/emmm.202012595), 2020-12-03

## APPENDIX

### Table of Contents:

|                                                                                                                                                    |    |
|----------------------------------------------------------------------------------------------------------------------------------------------------|----|
| CReATe Consortium Author List .....                                                                                                                | 2  |
| Supplementary Figures .....                                                                                                                        | 5  |
| Appendix Figure S1. Principal Components in the CReATe PGB cohort .....                                                                            | 5  |
| Appendix Figure S2. <i>p</i> value calculation for sCCA modeling .....                                                                             | 6  |
| Appendix Figure S3. Variables selected in sCCA modeling excluding patients with<br>primary lateral sclerosis and progressive muscular atrophy .... | 7  |
| Appendix Figure S4. wPRS calculated with and without variants in high LD .....                                                                     | 8  |
| Appendix Figure S5. Reduced cortical thickness in ALS patients relative to<br>healthy controls .....                                               | 9  |
| Appendix Figure S6. Magnitude of TDP-43 pathology in ALS cases at autopsy<br>relative to wPRS .....                                                | 10 |

## CReATe Consortium Author List:

| <b>Name</b>                | <b>Location</b>                             | <b>Role</b>                      | <b>Contribution</b>                                                  |
|----------------------------|---------------------------------------------|----------------------------------|----------------------------------------------------------------------|
| Sumaira Hussain            | University of Miami, USA                    | Project Manager                  | Regulatory lead; multi-center oversight and project management       |
| Anne Cooley                | University of Miami, USA                    | Associate Project & Data Manager | Multi-center oversight and project management; data query resolution |
| Yindi Li                   | University of Miami, USA                    | Statistical programmer           | Data management                                                      |
| Marielle Wallace           | University of Miami, USA                    | Data Manager                     | Data management                                                      |
| Julie Steele               | University of Miami, USA                    | Outcomes Coordinator             | Training and certification of site coordinators in outcome measures  |
| Jessica P. Hernandez       | University of Miami, USA                    | Research Coordinator             | Visit coordination and data collection                               |
| Jessica Medina             | University of Miami, USA                    | Research Coordinator             | Visit coordination and data collection                               |
| Maria Elena Paredes        | University of Miami, USA                    | Research Coordinator             | Visit coordination and data collection                               |
| Kristina M Reyes           | University of Miami                         | Research Coordinator             | Visit coordination and data collection                               |
| Ashley Manso               | University of Miami, USA                    | Research Coordinator             | Data collection and review                                           |
| Natalia Ravelo             | University of Miami, USA                    | Research Coordinator             | Visit coordination and data collection                               |
| Wendy Levy                 | University of Miami, USA                    | Research Coordinator             | Visit coordination and data collection                               |
| Patrice Whitehead          | John P Hussman Institute for Human Genomics | Biorepository Technical Director | CReATe Biorepository laboratory oversight                            |
| Stephan Zuchner, MD, PhD   | University of Miami, USA                    | Co-investigator                  | CReATe Consortium Genetic Working Group member                       |
| Richard Barohn, MD         | University of Kansas Medical Center, USA    | Sub-investigator                 | Data collection                                                      |
| Mamatha Pasnoor, MD        | University of Kansas Medical Center, USA    | Sub-investigator                 | Data collection                                                      |
| Omar Jawdat, MD            | University of Kansas Medical Center, USA    | Sub-investigator                 | Data collection                                                      |
| Duaa Jabari, MD            | University of Kansas Medical Center, USA    | Sub-investigator                 | Data collection                                                      |
| Constantine Farmakidis, MD | University of Kansas Medical Center, USA    | Sub-investigator                 | Data collection                                                      |
| Melanie Glenn, MD          | University of Kansas Medical Center, USA    | Sub-investigator                 | Data collection                                                      |

|                          |                                          |                       |                                        |
|--------------------------|------------------------------------------|-----------------------|----------------------------------------|
| Mazen M Dimachkie, MD    | University of Kansas Medical Center, USA | Sub-investigator      | Data collection                        |
| Laura Herbelin           | University of Kansas Medical Center, USA | Site Lead Coordinator | Visit coordination and data collection |
| Hellen Tanui             | University of Kansas Medical Center, USA | Research Coordinator  | Visit coordination and data collection |
| Sherri Anderson          | University of Kansas Medical Center, USA | Research Coordinator  | Visit coordination and data collection |
| Michaela Walker          | University of Kansas Medical Center, USA | Research Coordinator  | Visit coordination and data collection |
| Tina Liu                 | University of Kansas Medical Center, USA | Research Coordinator  | Visit coordination and data collection |
| Ayla McCally             | University of Kansas Medical Center, USA | Research Coordinator  | Visit coordination and data collection |
| Andrew Heim              | University of Kansas Medical Center, USA | Research Coordinator  | Visit coordination and data collection |
| Melissa Currence         | University of Kansas Medical Center, USA | Research Coordinator  | Visit coordination and data collection |
| Yolanda Harness          | University of Kansas Medical Center, USA | Research Coordinator  | Visit coordination and data collection |
| Kathryn Johns            | University of Kansas Medical Center, USA | Research Coordinator  | Visit coordination and data collection |
| Amruta Joshi             | University of Virginia, USA              | Research Coordinator  | Visit coordination and data collection |
| Mary Wagoner             | University of Virginia, USA              | Research Coordinator  | Visit coordination and data collection |
| Stephanie Lowenhaupt     | University of Virginia, USA              | Research Coordinator  | Visit coordination and data collection |
| Gil Gutierrez            | University of California San Diego, USA  | Research Coordinator  | Visit coordination and data collection |
| Danielle Vaporean-Bussey | University of California San Diego, USA  | Research Coordinator  | Visit coordination and data collection |
| Rose Previte             | University of California San Diego, USA  | Research Coordinator  | Visit coordination and data collection |
| Aaryn Greer-Belfer       | University of California San Diego, USA  | Research Coordinator  | Visit coordination and data collection |
| Ivy Chippendale Cass     | University of California San Diego, USA  | Research Coordinator  | Visit coordination and data collection |
| Sahana Malik             | University of California San Diego, USA  | Research Coordinator  | Visit coordination and data collection |
| Jeri Sieren              | University of Iowa, USA                  | Research Coordinator  | Visit coordination and data collection |
| Emilee Gibson            | University of Iowa, USA                  | Research Coordinator  | Visit coordination and data collection |

|                         |                                                               |                      |                                               |
|-------------------------|---------------------------------------------------------------|----------------------|-----------------------------------------------|
| Amy Conger              | UT Southwestern Medical Center, USA                           | Research Coordinator | Visit coordination and data collection        |
| Nina Gorham             | UT Southwestern Medical Center, USA                           | Research Coordinator | Visit coordination and data collection        |
| Simon Carty             | California Pacific Medical Center, USA                        | Research Coordinator | Visit coordination and data collection        |
| Jennifer Milan          | California Pacific Medical Center, USA                        | Research Coordinator | Visit coordination and data collection        |
| Debbie Hastings         | Cleveland Clinic, USA                                         | Research Coordinator | Visit coordination and data collection        |
| Irys Caristo            | Cleveland Clinic, USA                                         | Research Coordinator | Visit coordination and data collection        |
| Pamella Kittrell        | University of Texas Health Science Center at San Antonio, USA | Research Coordinator | Visit coordination and data collection        |
| Mozhdeh Marandi         | Wake Forest School of Medicine, USA                           | Research Coordinator | Visit coordination and data collection        |
| Summer Dawn Harris      | Wake Forest School of Medicine, USA                           | Research Coordinator | Visit coordination and data collection        |
| Mitchell John Reddan    | Stanford, USA                                                 | Research Coordinator | Visit coordination and data collection        |
| Jacinda Sampson, MD     | Stanford, USA                                                 | Sub-investigator     | Data Collection                               |
| Neelam Goyal, MD        | Stanford, USA                                                 | Sub-investigator     | Data Collection                               |
| Cherie Martinson        | Twin Cities, USA                                              | Research Coordinator | Visit coordination and data collection        |
| Radhika Edpuganti       | Twin Cities, USA                                              | Research Coordinator | Visit coordination and data collection        |
| Ezgi Tiryaki, MD        | Twin Cities, USA                                              | Sub-investigator     | Data Collection                               |
| Rebecca Schule, MD, PhD | University of Tübingen, Germany                               | Co-investigator      | CRaTE Consortium Genetic Working Group member |
| Marka Blitterswijk      | Jacksonville, USA                                             | Co-investigator      | CRaTE Consortium Genetic Working Group member |

**Supplementary Figures:**

**Appendix Figure S1. Principal Components in the CReATe PGB cohort.** Scatterplot showing the first principal component plotted against the second principal component from a principal components analysis conducted in the CReATe PGB cohort.

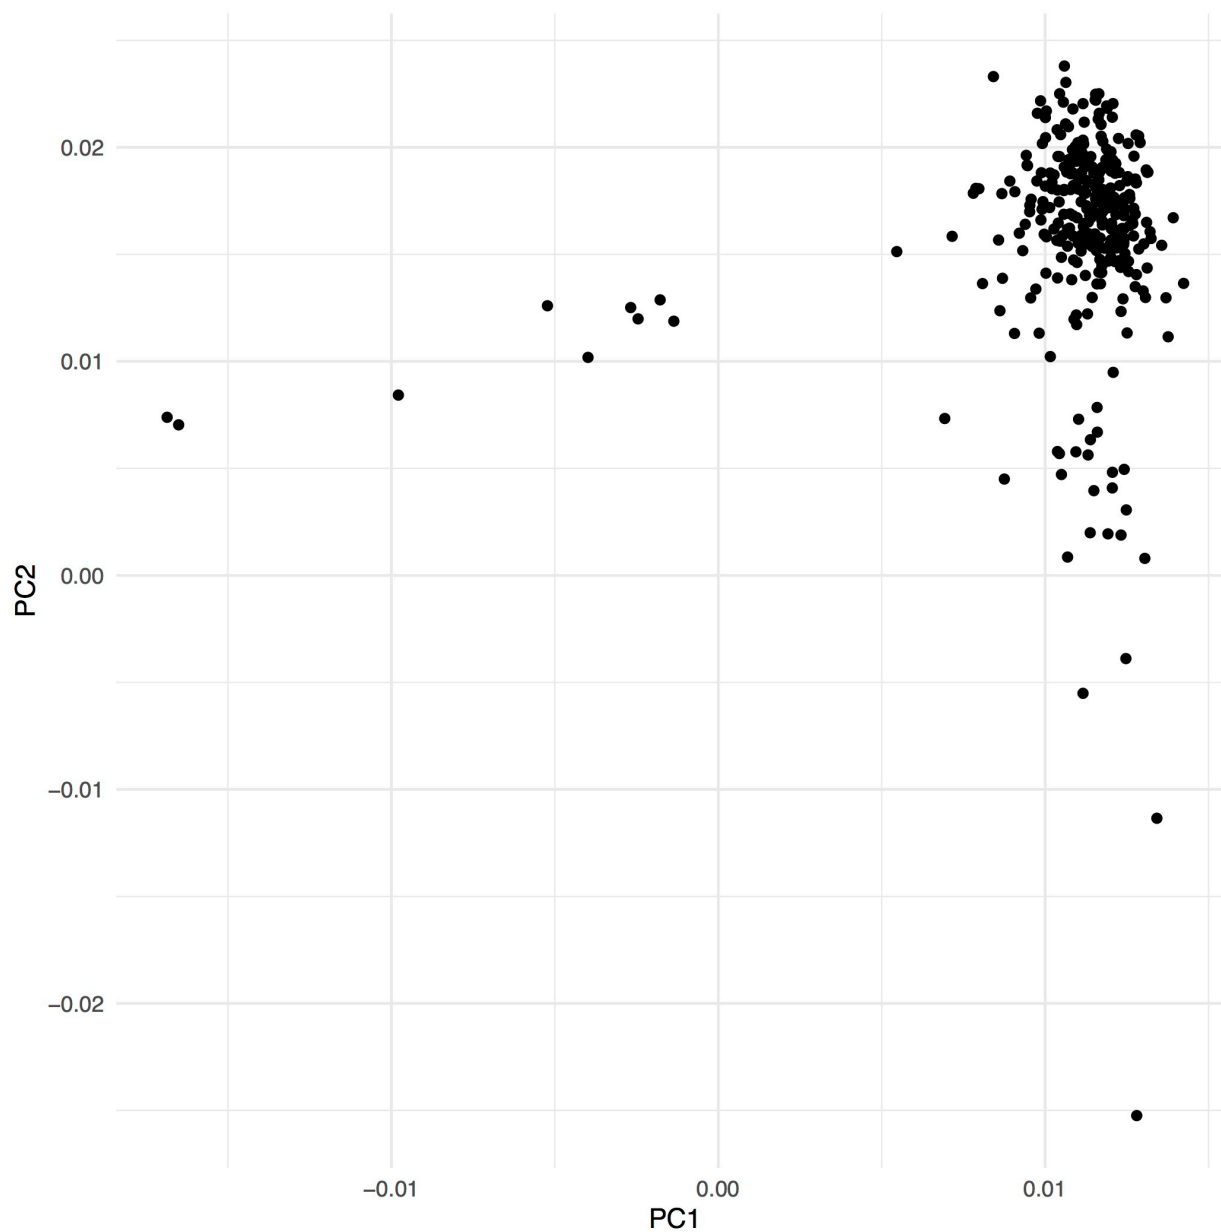

**Appendix Figure S2.  $p$  value calculation for sCCA modeling.** Histogram showing the frequency of canonical correlations achieved for sCCA modeling using 10,000 bootstrapped random permutations of the data. The vertical turquoise line denotes the median canonical correlation achieved under sCCA modeling of the true unpermuted data. The  $p$  value is the proportion of times the median canonical correlation ( $R$ ) for sCCA modeling of the true, unpermuted data was achieved by sCCA modeling of the randomly permuted data.

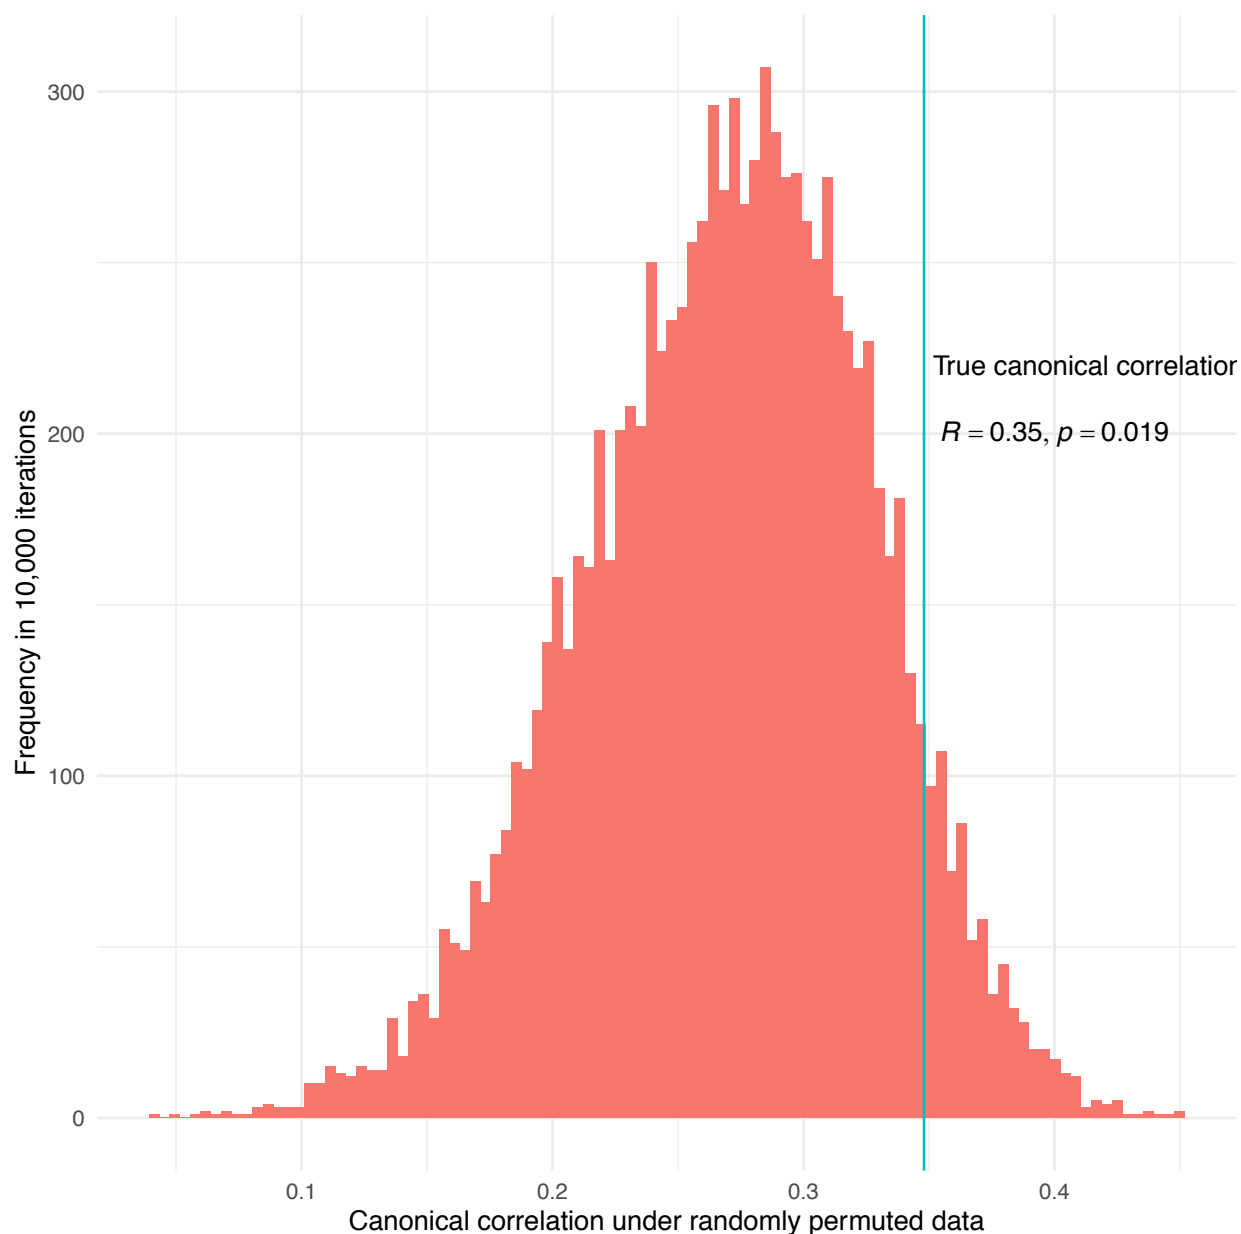

### Appendix Figure S3. Variables selected in sCCA modeling excluding patients with primary lateral sclerosis and progressive muscular atrophy.

A) Bar graphs demonstrating the proportion of times out of 10,000 iterations that each of the 11 clinical variables were selected by sCCA under true modeling (turquoise) and modeling under the null hypothesis (coral).

B) Bar graphs demonstrating the number of times out of 10,000 randomly-bootstrapped sCCAs that each of the 45 SNPs were selected by sCCA under true modeling (turquoise) and modeling under the null hypothesis (coral). SNPs are organized according to prior genome-wide association with ALS or joint association with ALS and FTD.

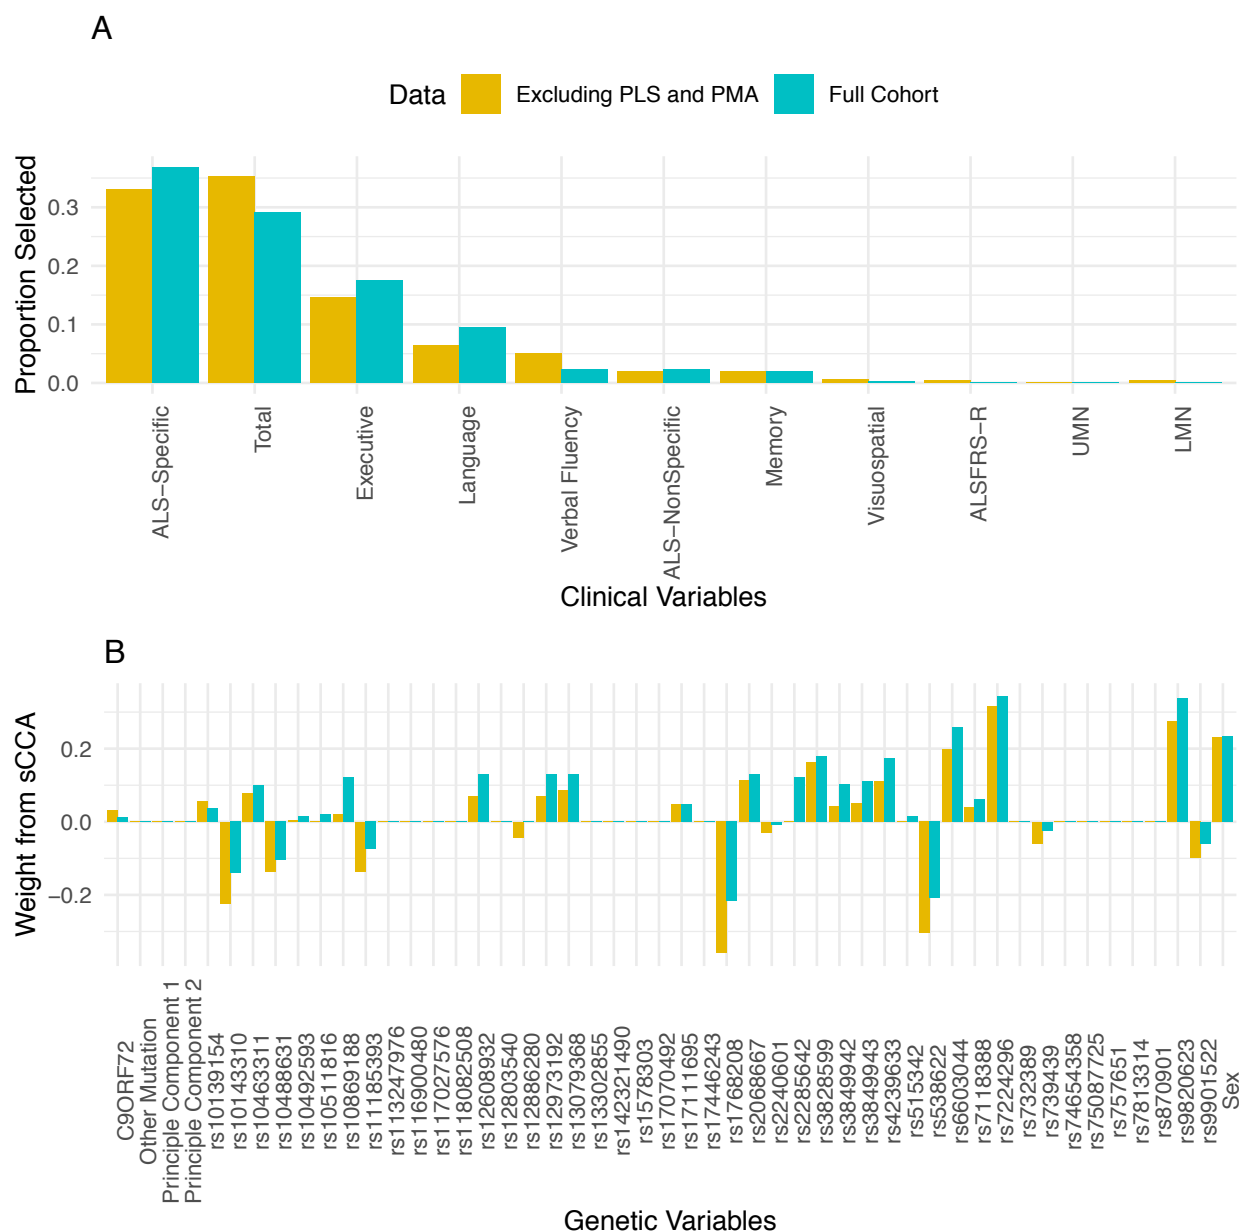

**Appendix Figure S4. wPRS calculated with and without variants in high LD.** Scatterplot depicting Pearson's correlation between the wPRS calculated using all genetic variables and the wPRS calculated excluding SNPs in high linkage disequilibrium.

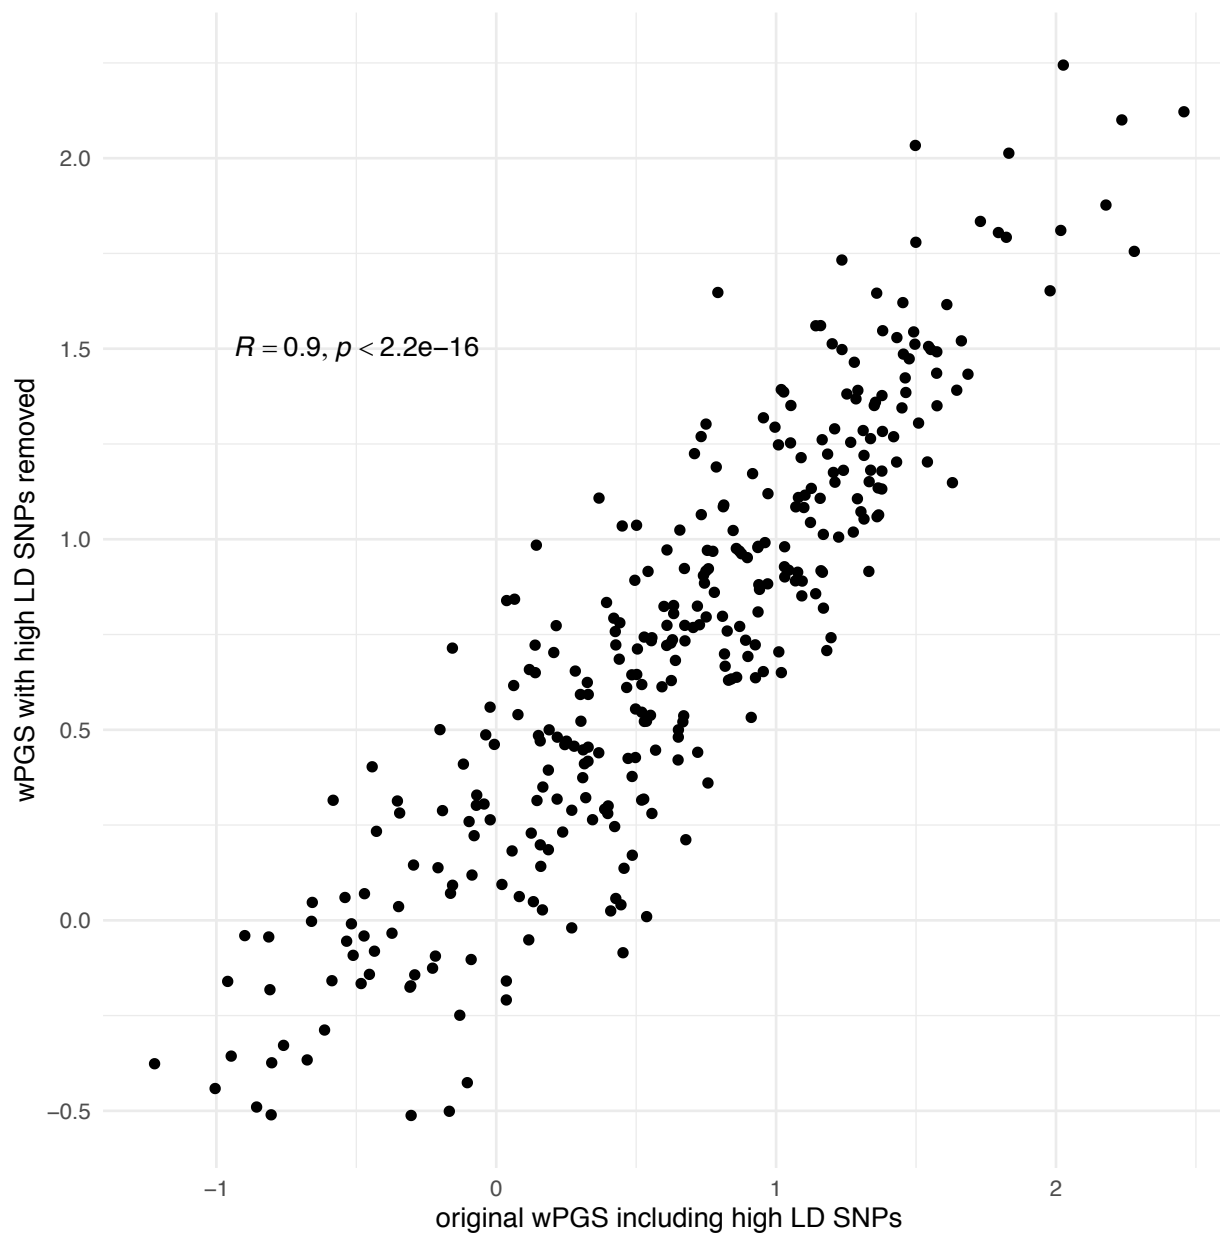



**Appendix Figure S5. Reduced cortical thickness in ALS patients relative to healthy controls.** ALS patients from the UPenn Biobank neuroimaging cohort displayed widespread cortical thinning relative to age, sex, and education-matched healthy controls in the frontal and temporal lobes. The heatmap indicates the associated T-statistic for each voxel, with light yellow representing the highest value.

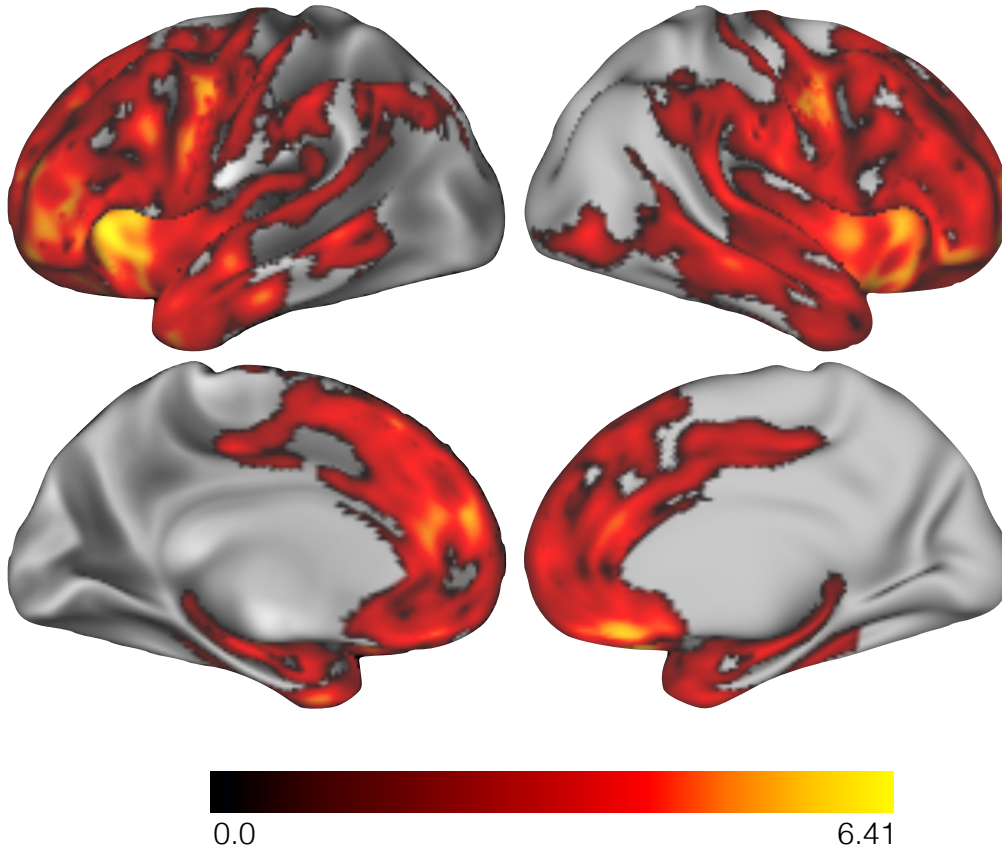

**Appendix Figure S6. Magnitude of TDP-43 pathology in ALS cases at autopsy relative to wPRS.** Beeswarm boxplots of ordinal measures of TDP-43 pathology in ALS cases the UPenn Biobank autopsy cohort relative to wPRS in the cingulate cortex, motor cortex, middle frontal cortex, superior / middle temporal cortex, and hippocampus. The central bands indicate the median, the box indicates the interquartile range (IQR) between the first and third quartiles, and the upper and lower whiskers indicate the largest or smallest value no further than the IQR multiplied by 1.5. For each brain region each data point represents a unique case.

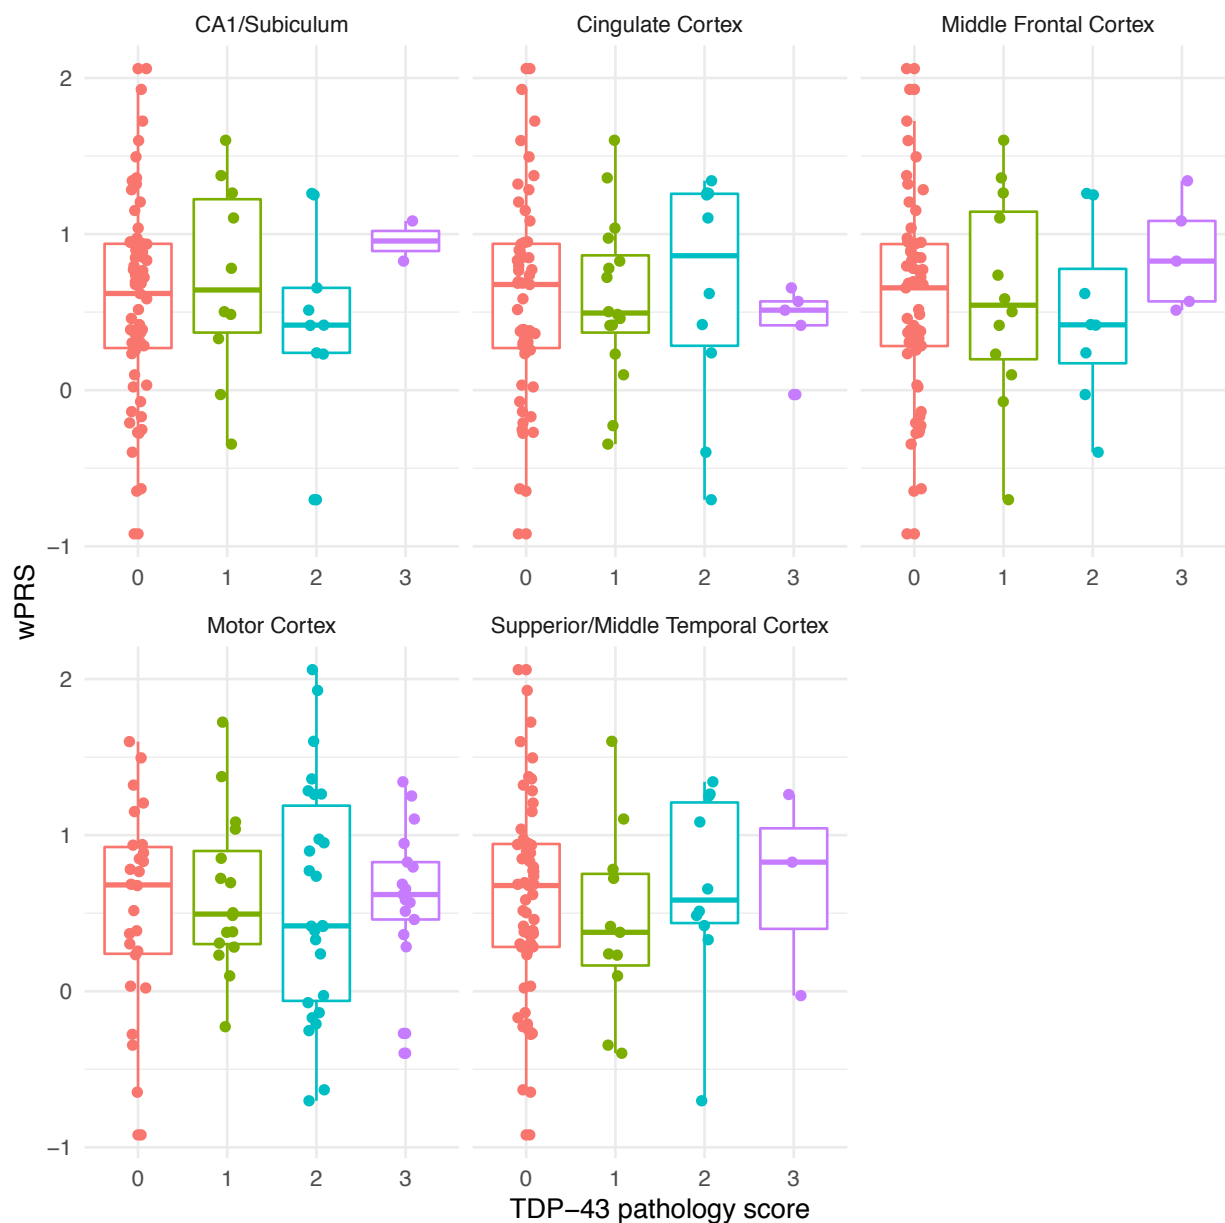

Supplement: EMMM-13-e12595-s001.pdf [file EMMM-13-e12595-s001.pdf]
